# Supplementary material for: Alterations in Titin Properties and Myocardial Fibrosis Correlate With Clinical Phenotypes in Hemodynamic Subgroups of Severe Aortic Stenosis
Source: PubMed Central journal article supplement — JACC Basic Transl Sci. 2018 Jun 25;3(3):335–46. doi: 10.1016/j.jacbts.2018.02.002 (PMC6059007; doi:10.1016/j.jacbts.2018.02.002), 2018-06-25
Supplement: mmc1.pdf [file mmc1.pdf]

## Supplementary Figure 1

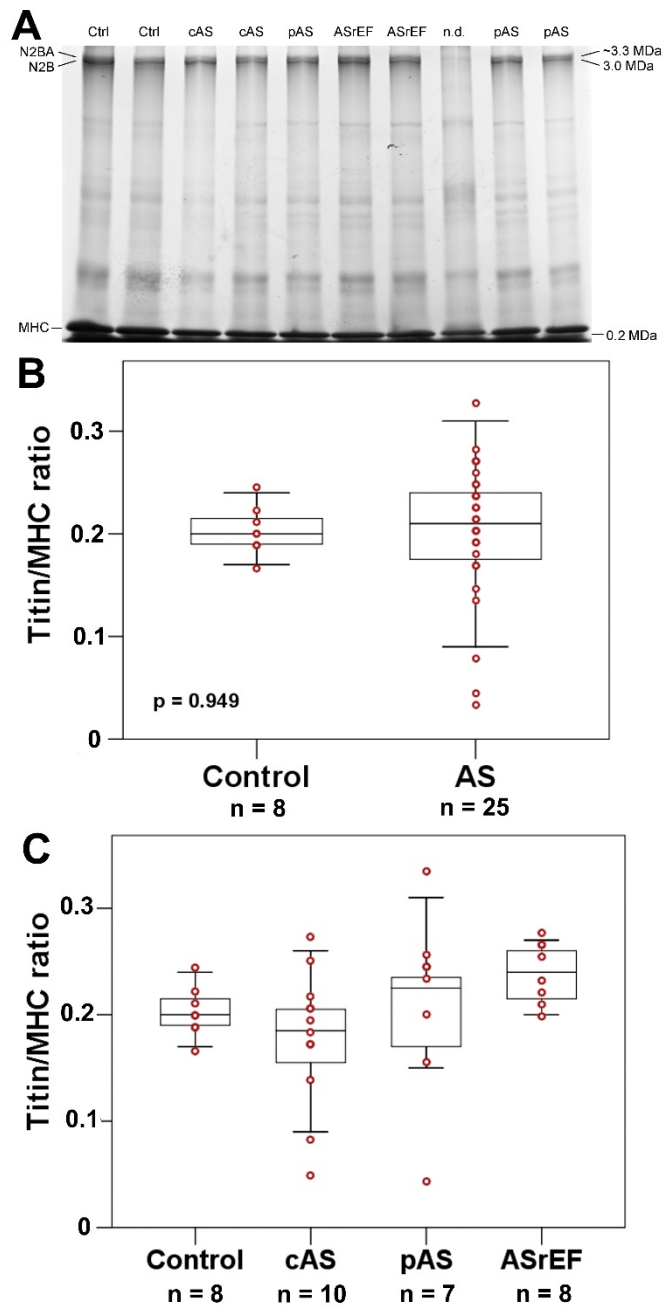

Titin to myosin heavy chain (MHC) expression ratio in non-failing donor (Control) and AS patient hearts. *A*, representative 2.5% SDS-polyacrylamide gel showing the titin isoforms and MHC. *B*, and *C*, Summary of results of densitometric analysis of titin and MHC protein expression, demonstrated as Titin/MHC ratio. Shown are box plots (median [1<sup>st</sup> quartile-3<sup>rd</sup> quartile) with whiskers and individual data points (red open circles). *B*, Mann-Whitney U test revealed no statistically significant differences between controls and all AS patients ( $p = 0.949$ ). *C*, Comparison was made between AS subgroups using Kruskal-Wallis test, revealing no significant differences. cAS, “classical” AS; pAS, “paradoxical” AS; ASrEF, AS with reduced LV ejection fraction.
